# Supplementary material for: Mortality is increased in patients with rheumatoid arthritis or diabetes compared to the general population – the Nord-Trøndelag Health Study
Source: PubMed Central journal article supplement (PMC7046618; doi:10.1038/s41598-020-60621-2), 2020-02-27
Supplement: 41598_2020_60621_MOESM1_ESM.pdf [file 41598_2020_60621_MOESM1_ESM.pdf]

## SUPPLEMENTARY FILE

### **Mortality is increased in patients with rheumatoid arthritis or diabetes compared to the general population – the Nord-Trøndelag Health Study**

Ingrid Sæther Houge<sup>1</sup>, Mari Hoff<sup>2,3</sup>, Ranjeny Thomas<sup>4</sup>, Vibeke Videm\*<sup>1,5</sup>

<sup>1</sup>Department of Clinical and Molecular Medicine, NTNU - Norwegian University of Science and Technology, Trondheim, Norway

<sup>2</sup>Department of Public Health and Nursing, NTNU – Norwegian University of Science and Technology, Trondheim, Norway

<sup>3</sup>Department of Rheumatology, St. Olavs University Hospital, Trondheim, Norway

<sup>4</sup>Diamantina Institute, University of Queensland, Brisbane, Australia

<sup>5</sup>Department of Immunology and Transfusion Medicine, St. Olavs University Hospital, Trondheim, Norway

\*Vibeke Videm, MD, PhD

Department of Clinical and Molecular Medicine, Lab Center 3 East

St. Olavs University Hospital, NO-7006 Trondheim, Norway

Tel: +47 72 57 33 21, Fax: +47 72 27 64 26, e-mail: [vibeke.videm@ntnu.no](mailto:vibeke.videm@ntnu.no)

**Supplementary Table S1: Baseline and disease-specific characteristics including participants with missing covariates <sup>1,2,3</sup>**

|                                 | <b>RA</b>            | <b>Diabetes</b>      | <b>RA +<br/>Diabetes</b> | <b>Controls</b>      |
|---------------------------------|----------------------|----------------------|--------------------------|----------------------|
|                                 | <b>N=475</b>         | <b>N=3,820</b>       | <b>N=41</b>              | <b>N=72,582</b>      |
| <b>Baseline characteristics</b> |                      |                      |                          |                      |
| Sex                             |                      |                      |                          |                      |
| Female                          | 326 (69)             | 1,852 (48)           | 25 (61)                  | 38,571 (53)          |
| Male                            | 149 (31)             | 1,969 (52)           | 16 (39)                  | 34,024 (47)          |
| Age (years)                     | 58 (49, 68)          | 62 (51, 73)          | 66 (59, 73)              | 46 (34, 60)          |
| Smoking status                  |                      |                      |                          |                      |
| Never smoker                    | 152 (32)             | 1,527 (40)           | 18 (44)                  | 31,569 (43)          |
| Former smoker                   | 160 (34)             | 846 (22)             | 9 (22)                   | 19,788 (27)          |
| Current smoker                  | 140 (29)             | 1,156 (30)           | 14 (34)                  | 16,407 (23)          |
| Previous CVD <sup>4</sup>       | 51 (11)              | 754 (20)             | 10 (24)                  | 4,685 (6)            |
| BMI (kg/m <sup>2</sup> )        | 26.1<br>(23.8, 29.0) | 28.9<br>(26.1, 32.2) | 27.8<br>(24.4, 30.9)     | 25.7<br>(23.4, 28.4) |
| Hypertension <sup>5</sup>       | 233 (49)             | 2,711 (71)           | 29 (71)                  | 27,609 (38)          |
| Waist/hip ratio                 | 0.84<br>(0.79, 0.90) | 0.90<br>(0.84, 0.96) | 0.88<br>(0.84, 0.93)     | 0.85<br>(0.79, 0.90) |
| Non- fasting glucose            | 5.2 (4.7, 5.9)       | 7.3 (5.7, 10.7)      | 6.7 (5.5, 9.6)           | 5.1 (4.7, 5.6)       |

(mmol/L)

|                                            |                |                |                |                |
|--------------------------------------------|----------------|----------------|----------------|----------------|
| Creatinine ( $\mu\text{mol/L}$ )           | 83 (76, 92)    | 89 (80, 99)    | 85 (79, 96)    | 85 (77, 94)    |
| Triglycerides (mmol/L)                     | 1.4 (1.0, 2.0) | 2.1 (1.4, 3.1) | 1.6 (1.3, 2.4) | 1.4 (1.0, 2.1) |
| Total cholesterol (mmol/L)                 | 5.9 (5.2, 6.8) | 6.0 (5.2, 6.9) | 6.0 (5.2, 6.8) | 5.6 (4.8, 6.5) |
| HDL cholesterol (mmol/L)                   | 1.4 (1.1, 1.7) | 1.2 (0.9, 1.4) | 1.3 (1.1, 1.6) | 1.3 (1.1, 1.6) |
| Total cholesterol/HDL<br>cholesterol ratio | 4.2 (3.4, 5.4) | 5.1 (4.1, 6.5) | 4.5 (3.6, 5.5) | 4.2 (3.3, 5.3) |

|                          |                      |                     |                     |                     |
|--------------------------|----------------------|---------------------|---------------------|---------------------|
| Observation time (years) | 18.0<br>(12.1, 18.8) | 17.4<br>(7.5, 18.4) | 14.6<br>(7.2, 18.2) | 17.9<br>(8.0, 18.7) |
|--------------------------|----------------------|---------------------|---------------------|---------------------|

#### **RA-specific variables**

|                                                                          |             |  |             |  |
|--------------------------------------------------------------------------|-------------|--|-------------|--|
| Seropositive <sup>6</sup>                                                | 348 (73)    |  | 31 (76)     |  |
| Age when diagnosed (years)                                               | 55 (44, 65) |  | 61 (53, 70) |  |
| RA duration before first<br>HUNT participation with<br>diagnosis (years) | 6 (3, 9)    |  | 7 (4, 9)    |  |

#### **Diabetes-specific variables**

|                               |  |             |             |  |
|-------------------------------|--|-------------|-------------|--|
| Peroral diabetes medication   |  | 1,469 (38)  | 15 (37)     |  |
| Insulin                       |  | 722 (19)    | 10 (24)     |  |
| Age when diagnosed<br>(years) |  | 59 (49, 68) | 61 (50, 69) |  |

|                                                                                |           |           |
|--------------------------------------------------------------------------------|-----------|-----------|
| Diabetes duration before<br>first HUNT participation<br>with diagnosis (years) | 5 (2, 11) | 6 (3, 12) |
|--------------------------------------------------------------------------------|-----------|-----------|

---

<sup>1</sup>Number (%) or median (25<sup>th</sup> and 75<sup>th</sup> percentile)

<sup>2</sup>RA: rheumatoid arthritis, CVD: cardiovascular disease, BMI: body mass index, HDL: high-density lipoprotein

<sup>3</sup>Missing data – <4% missing data except for smoking, blood pressure, creatinine, triglycerides and diabetes-specific variables. Smoking missing for 3,176 (5 %) and 1,970 (13%) with baseline in HUNT2 and HUNT3, respectively. Blood pressure missing for 1,900 (13%) with baseline in HUNT3. Creatinine and triglycerides missing for 3,777 (25%) with baseline in HUNT3. Diabetes-specific variables: peroral diabetes medication use missing for 1,058 (27%), insulin use missing for 1,072 (28 %), duration of diabetes and age of diabetes onset missing for 299 (8%).

<sup>4</sup>Previous cardiovascular disease: self-reported angina, stroke, or myocardial infarction

<sup>5</sup>Hypertension: Systolic blood pressure  $\geq 140$ , diastolic blood pressure  $\geq 90$ , or on blood pressure-lowering medication

<sup>6</sup>Seropositive – positive for either rheumatoid factor and/or anti-citrullinated protein antibodies

**Supplementary Table S2: Sensitivity analyses 1, 4, and 5**

|                                                                                                                           | <b>Hazard<br/>ratio</b> | <b>95 % Confidence<br/>interval</b> | <b>P-value</b> |
|---------------------------------------------------------------------------------------------------------------------------|-------------------------|-------------------------------------|----------------|
| <b>Sensitivity analysis 1: Cox regression for mortality by age groups</b>                                                 |                         |                                     |                |
| Rheumatoid arthritis ≤75 years                                                                                            | 1.21                    | 0.79-1.62                           | 0.25           |
| Rheumatoid arthritis >75 years                                                                                            | 1.24                    | 1.01-1.48                           | 0.035          |
| Diabetes age ≤75 years                                                                                                    | 1.83                    | 1.61-2.05                           | <0.001         |
| Diabetes age >75 years                                                                                                    | 1.49                    | 1.39-1.59                           | <0.001         |
| <b>Sensitivity analysis 4: Cox regression for mortality after multiple imputation of missing<br/>adjustment variables</b> |                         |                                     |                |
| Rheumatoid arthritis                                                                                                      | 1.20                    | 1.03-1.40                           | 0.021          |
| Diabetes age ≤75 years                                                                                                    | 1.90                    | 1.70-2.12                           | <0.001         |
| Diabetes age >75 years                                                                                                    | 1.43                    | 1.27-1.62                           | <0.001         |
| <b>Sensitivity analysis 5: Cox regression for mortality excluding patients with both diseases</b>                         |                         |                                     |                |
| Rheumatoid arthritis                                                                                                      | 1.24                    | 1.02-1.46                           | 0.017          |
| Diabetes age ≤75 years                                                                                                    | 1.83                    | 1.61-2.06                           | <0.001         |
| Diabetes age >75 years                                                                                                    | 1.52                    | 1.39-1.59                           | <0.001         |

All models are from Step 3, i.e. adjusted for sex, hypertension <sup>1</sup>, smoking <sup>2</sup>, BMI <sup>3</sup>, creatinine, total cholesterol, and previous cardiovascular disease <sup>4</sup>

Age was used as the time variable and was thereby adjusted for in all models

Abbreviations: BMI – body mass index

<sup>1</sup>Hypertension: Systolic blood pressure  $\geq 140$ , diastolic blood pressure  $\geq 90$ , or on blood pressure-lowering medication

<sup>2</sup>Smoking: never smoker, current smoker or former smoker

<sup>3</sup>BMI: categorised as  $<18.5 \text{ kg/m}^2$ ,  $18.5\text{-}24.9 \text{ kg/m}^2$ ,  $25\text{-}29.9 \text{ kg/m}^2$ ,  $30\text{-}34.9 \text{ kg/m}^2$  and  $\geq 35 \text{ kg/m}^2$

<sup>4</sup>Previous cardiovascular disease: self-reported angina, stroke, or myocardial infarction
